# Supplementary material
Source: publisher site journal article supplement (https://www.dovepress.com/article/323846)
Supplement: Supplementary file 1 [file get_supplementary_file.php]

# PATIENTS' ATTITUDES AND OPINIONS ON DEPRESCRIBING QUESTIONNAIRE

1. DATE OF BIRTH

2. SEX

male

female

3. PLEASE STATE ALL MEDICATION YOU ARE CURRENTLY TAKING, THAT YOU HAVE BEEN TAKING FOR LONGER THAN ONE MONTH. PLEASE STATE HOW YOU ARE TAKING YOUR MEDICATION

1.

9.

2.

10.

3.

11.

4.

12.

5.

13.

6.

14.

7.

15.

8.

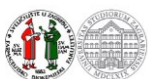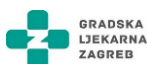

# questionnaire:

FOR THE FOLLOWING STATEMENTS, INDICATE THE EXTENT TO WHICH YOU AGREE WITH THEM:

|                                                                                                                                 | strongly agree | agree | unsure | disagree | strongly disagree |
|---------------------------------------------------------------------------------------------------------------------------------|----------------|-------|--------|----------|-------------------|
| Sometimes I think I take too many medicines                                                                                     |                |       |        |          |                   |
| Taking my medicines every day is very inconvenient                                                                              |                |       |        |          |                   |
| I spend a lot of money on my medicines                                                                                          |                |       |        |          |                   |
| I feel that my medicines are a burden to me                                                                                     |                |       |        |          |                   |
| I feel that I am taking a large number of medicines                                                                             |                |       |        |          |                   |
| I feel that I may be taking one or more medicines that I no longer need                                                         |                |       |        |          |                   |
| I would like to try stopping one of my medicines to see how i feel without it                                                   |                |       |        |          |                   |
| I would like my doctor to reduce the dose of one or more of my medicines                                                        |                |       |        |          |                   |
| I think one or more of m medicines may not be working                                                                           |                |       |        |          |                   |
| I believe one or more of my medicines may be currently giving me side effects                                                   |                |       |        |          |                   |
| I would be reluctant to stop a medicine that I had been taking for a long time                                                  |                |       |        |          |                   |
| If one of my medicines was stopped, I woukd be worried about missing out on future benefits                                     |                |       |        |          |                   |
| I get stressed whenever changes are made to my medicines                                                                        |                |       |        |          |                   |
| If my doctor recommended stopping a medicine, I would feel that he/she was giving up on me                                      |                |       |        |          |                   |
| I have had a bad experience when stopping a medicine before                                                                     |                |       |        |          |                   |
| I have a good understanding of the resons I was prescribed each of my medicines                                                 |                |       |        |          |                   |
| I know exactly what medicines I am currently taking, and/or I keep an up-to-date list of my medicines                           |                |       |        |          |                   |
| I like to know as much as possible about my medicines                                                                           |                |       |        |          |                   |
| I like to be involved in making decisions about my medicines with my doctors                                                    |                |       |        |          |                   |
| I always ask my doctor, pharmacist or other healthcare professional if there is something I don't understand about my medicines |                |       |        |          |                   |
| If my doctor said it was possible I would be willing to stop one or more of my regular medicines                                |                |       |        |          |                   |
| Overall, I am satisfied with my current medicines                                                                               |                |       |        |          |                   |

|                                                                                                                                                                                               |                  |                |             |               |                    |
|-----------------------------------------------------------------------------------------------------------------------------------------------------------------------------------------------|------------------|----------------|-------------|---------------|--------------------|
|                                                                                                                                                                                               | very comfortable | comfortable    | unsure      | uncomfortable | very uncomfortable |
| How would you feel if a pharmacist was involved in the process of stopping the use of one or more of your regular medications, and provided follow up? (in collaboration with your physician) |                  |                |             |               |                    |
|                                                                                                                                                                                               | telephone call   | pharmacy visit | mail/e-mail | no follow-up  | other              |
| If you were to stop using one or more of your regular medication in collaboration with your pharmacist and physician, what follow-up method would you prefer?                                 |                  |                |             |               |                    |
|                                                                                                                                                                                               | yes              | unsure         | no          |               |                    |
| Do you believe your pharmacist has enough knowledge, skills, and information about your medications to suggest deprescribing to you and your physician?                                       |                  |                |             |               |                    |
| What medication/s would you LIKE to stop taking (that you believe you no longer need, or feel is causing you harm)?                                                                           |                  |                |             |               |                    |
| What medication/s you would NOT LIKE to stop taking?                                                                                                                                          |                  |                |             |               |                    |

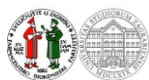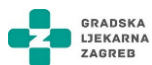

# questionnaire:
